# Supplementary material
Source: PubMed Central journal article supplement (PMC4450373)
Supplement: pnas.1506593112.sd01.pdf [file pnas.1506593112.sd01.pdf]

PNAS TABLE S1

| gene_symbol | Site Position | Protein Id        | Max Score | sequence                  | Unstimulated |         | Stimulated 1 h AO |               |       |
|-------------|---------------|-------------------|-----------|---------------------------|--------------|---------|-------------------|---------------|-------|
|             |               |                   |           |                           | PARKIN WT    |         |                   | PARKIN[C431S] |       |
|             |               |                   |           |                           | UB_WT        | UB_S65A | UB_WT             | UB_S65A       | UB_WT |
| ACSL1       | 207           | sp P33211 ACSL1   | 1000      | K.KA#LLEGVENK.L           | 0            | 0       | 1                 | 1             | 0     |
| ACSL4       | 702           | sp O60488 ACSL4   | 1000      | R.NHYLK#DIER.M            | 0            | 0       | 1                 | 0             | 0     |
| ARMCX3      | 295           | sp Q9UH62 ARMCX3  | 1000      | R.AQVPSLGLSFLNK#K.E       | 0            | 0       | 1                 | 1             | 0     |
| ATAD1       | 112           | sp Q8NBU5 ATAD1   | 1000      | K.DTVLPIK#K.K             | 0            | 0       | 1                 | 1             | 0     |
| ATAD1       | 263           | sp Q8NBU5 ATAD1   | 1000      | R.FHINQPALK#QR.E          | 0            | 0       | 1                 | 0             | 0     |
| ATAD1       | 274           | sp Q8NBU5 ATAD1   | 1000      | K.LILK#NENVDR.H           | 0            | 0       | 2                 | 2             | 0     |
| CISD1       | 42            | sp Q9NZ45 CISD1   | 1000      | R.NK#AM#INLHIQK.D         | 0            | 0       | 2                 | 0             | 0     |
| CISD1       | 79            | sp Q9NZ45 CISD1   | 1000      | K.K#PFPCDGAHTK.H          | 0            | 0       | 1                 | 1             | 0     |
| CISD1       | 104           | sp Q9NZ45 CISD1   | 1000      | K.HNEETGDNVGPLIK#K.K      | 2            | 0       | 11                | 10            | 0     |
| CISD2       | 131           | sp Q8N5K1 CISD2   | 1000      | K.HNELTGDVNGVPLIK#K.K     | 0            | 0       | 1                 | 0             | 0     |
| CYB5R1      | 124           | sp Q9UHQ9 NB5R1   | 1000      | K.GVHPK#FPEGK.M           | 0            | 0       | 1                 | 1             | 0     |
| CYB5R1      | 167           | sp Q9UHQ9 NB5R1   | 1000      | K.GHFNIQPNK#K.S           | 0            | 0       | 1                 | 0             | 0     |
| DCAKD       | 186           | sp Q8WVVC6 DCAKD  | 1000      | R.HVLDNSGEVSVTK#R.Q       | 0            | 0       | 1                 | 0             | 0     |
| DLST        | 353           | sp P36957 ODO2    | 1000      | R.TITELGEK#AR.K           | 1            | 0       | 2                 | 1             | 0     |
| DNAJC11     | 31            | sp Q9NVH1 DJC11   | 1000      | R.REASSEELK#AAAYR.R       | 0            | 0       | 2                 | 0             | 1     |
| DNAJC11     | 83            | sp Q9NVH1 DJC11   | 1000      | R.AYDIYK#R.G              | 0            | 0       | 1                 | 0             | 0     |
| DNAJC11     | 434           | sp Q9NVH1 DJC11   | 1000      | R.ESAATDVLOK#K.Q          | 0            | 0       | 2                 | 1             | 0     |
| ELMOD2      | 61            | sp Q8IZ81 ELMD2   | 1000      | K.VLOK#ATHVVQSEVDK.Y      | 0            | 0       | 1                 | 0             | 0     |
| ELMOD2      | 150           | sp Q8IZ81 ELMD2   | 1000      | R.ISK#QWAEIGFOGDDPK.T     | 0            | 0       | 1                 | 0             | 0     |
| FAF2        | 167           | sp Q96CS3 FAF2    | 1000      | R.AHPVVFYQGTYSQALNDAK#R.E | 0            | 0       | 2                 | 0             | 0     |
| FAF2        | 329           | sp Q96CS3 FAF2    | 1000      | K.EEEVQQQK#LAEER.R        | 0            | 0       | 1                 | 0             | 0     |
| FAF2        | 367           | sp Q96CS3 FAF2    | 1000      | K.IIFK#LPNDSR.V           | 0            | 0       | 4                 | 3             | 0     |
| FIS1        | 25            | sp Q9Y3D6 FIS1    | 1000      | K.FQSEK#AAGSVSK.S         | 0            | 0       | 1                 | 1             | 0     |
| FIS1        | 89            | sp Q9Y3D6 FIS1    | 1000      | K.EYEK#ALK#YVR.G          | 0            | 0       | 1                 | 2             | 0     |
| FIS1        | 92            | sp Q9Y3D6 FIS1    | 1000      | K.EYEK#ALK#YVR.G          | 0            | 0       | 1                 | 2             | 0     |
| FKBP8       | 341           | sp Q14318-2 FKBP8 | 1000      | K.LEPSNK#TIHAELSK.L       | 0            | 0       | 1                 | 2             | 0     |
| FUNDC2      | 150           | sp Q9BWH2 FUND2   | 1000      | R.K#SNQIPTEV.R.S          | 0            | 0       | 1                 | 0             | 0     |
| GDAP1       | 172           | sp Q8TB36 GDAP1   | 1000      | R.SQIGNTESELK#K.L         | 0            | 0       | 4                 | 2             | 0     |
| GDAP1       | 188           | sp Q8TB36 GDAP1   | 1000      | K.LAEENPDQEAYIAK#QK#R.L   | 0            | 0       | 1                 | 0             | 0     |
| GDAP1       | 190           | sp Q8TB36 GDAP1   | 1000      | K.LAEENPDQEAYIAK#QK#R.L   | 0            | 0       | 1                 | 0             | 0     |
| GDAP1       | 203           | sp Q8TB36 GDAP1   | 1000      | K.LLDHDNVK#YLK#K.I        | 0            | 0       | 3                 | 0             | 0     |
| GDAP1       | 206           | sp Q8TB36 GDAP1   | 1000      | K.LLDHDNVK#YLK#K.I        | 0            | 0       | 1                 | 0             | 0     |
| GK          | 128           | sp P32189 GLPK    | 1000      | R.TQSTVESLSK#R.I          | 0            | 0       | 2                 | 0             | 0     |
| HK1         | 180           | sp P19367-3 HXX1  | 1000      | K.RFK#ASGVEGADVVK.L       | 0            | 0       | 1                 | 0             | 0     |
| HK1         | 191           | sp P19367-3 HXX1  | 1000      | K.ASGVEGADVVK#LLNK.A      | 0            | 0       | 2                 | 2             | 0     |
| HK1         | 195           | sp P19367-3 HXX1  | 1000      | K.LLNK#AIK.K              | 0            | 0       | 1                 | 1             | 0     |
| HK1         | 294           | sp P19367-3 HXX1  | 1000      | R.GSLNPGK#QLFEK.M         | 0            | 0       | 1                 | 1             | 0     |
| HK1         | 316           | sp P19367-3 HXX1  | 1000      | R.LLIVK#MAK.E             | 0            | 0       | 2                 | 0             | 0     |
| HK1         | 337           | sp P19367-3 HXX1  | 1000      | R.GK#FNTSDVSAIEK.N        | 0            | 0       | 1                 | 2             | 0     |
| HK1         | 348           | sp P19367-3 HXX1  | 1000      | K.FNTSDVSAIEK#NK.E        | 0            | 0       | 4                 | 4             | 0     |
| HK1         | 767           | sp P19367-3 HXX1  | 1000      | R.NLIDFTK#K.G             | 0            | 0       | 3                 | 2             | 0     |
| HK1         | 768           | sp P19367-3 HXX1  | 1000      | K.K#GFLFR.G               | 0            | 0       | 1                 | 1             | 0     |
| HK1         | 781           | sp P19367-3 HXX1  | 1000      | R.GQISETLK#TR.G           | 0            | 1       | 9                 | 11            | 0     |
| HK1         | 884           | sp P19367-3 HXX1  | 1000      | R.IM#HQTVK#ELSPK.C        | 0            | 0       | 2                 | 1             | 0     |
| HSDL1       | 64            | sp Q3SXMS5 HSDL1  | 1000      | R.ADLIK#QYGR.W            | 0            | 0       | 0                 | 1             | 0     |
| HSDL1       | 103           | sp Q3SXMS5 HSDL1  | 1000      | R.NEEK#LQVVAK.D           | 0            | 0       | 1                 | 1             | 0     |
| HSDL1       | 109           | sp Q3SXMS5 HSDL1  | 1000      | K.LQVVAK#DIADTYK.V        | 0            | 0       | 1                 | 1             | 0     |
| MAOA        | 82            | sp P21397 AOFA    | 1000      | R.LSK#ELGIETYK.V          | 0            | 0       | 1                 | 0             | 0     |
| MAOA        | 372           | sp P21397 AOFA    | 1000      | K.K#ICELYAK.V             | 0            | 0       | 1                 | 0             | 0     |
| MAOB        | 52            | sp P27338 AOFB    | 1000      | K.VK#YVDLGGSYVGPQNR.I     | 0            | 0       | 1                 | 1             | 0     |
| MCL1        | 40            | sp Q07820 MCL1    | 1000      | R.LLATEK#EASAR.R          | 0            | 0       | 1                 | 1             | 0     |
| MCL1        | 194           | sp Q07820 MCL1    | 1000      | R.EQATGAK#DTK#PM#GR.S     | 0            | 0       | 0                 | 0             | 1     |
| MCL1        | 197           | sp Q07820 MCL1    | 1000      | R.EQATGAK#DTK#PM#GR.S     | 0            | 0       | 0                 | 0             | 1     |
| MCL1        | 238           | sp Q07820 MCL1    | 1000      | K.LDIK#NEDDVK.S           | 0            | 0       | 1                 | 1             | 0     |
| MCL1        | 308           | sp Q07820 MCL1    | 1000      | K.RDWLVK#QR.G             | 2            | 0       | 3                 | 2             | 0     |
| MFN1        | 395           | sp Q8IWA4 MFN1    | 1000      | R.NQM#NLLTLDVK#K.K        | 1            | 0       | 10                | 4             | 0     |
| MFN1        | 396           | sp Q8IWA4 MFN1    | 1000      | R.NQM#NLLTLDVK#K.K.I      | 0            | 0       | 1                 | 0             | 0     |
| MFN1        | 399           | sp Q8IWA4 MFN1    | 1000      | K.IK#EVTEEVANK.V          | 0            | 0       | 1                 | 1             | 0     |
| MFN1        | 499           | sp Q8IWA4 MFN1    | 1000      | K.LHTLIPCK#K.F            | 0            | 0       | 2                 | 1             | 0     |
| MFN1        | 713           | sp Q8IWA4 MFN1    | 1000      | K.IQNNSK#LLR.N            | 0            | 0       | 1                 | 1             | 0     |
| MFN2        | 84            | sp O95140 MFN2    | 1000      | K.GYLSK#VR.G              | 0            | 0       | 1                 | 1             | 0     |
| MFN2        | 402           | sp O95140 MFN2    | 1000      | R.LK#FIDK.V               | 0            | 0       | 1                 | 0             | 0     |
| MFN2        | 416           | sp O95140 MFN2    | 1000      | K.QLELLAQDYK#LR.I         | 0            | 0       | 2                 | 1             | 0     |
| MFN2        | 420           | sp O95140 MFN2    | 1000      | R.IK#QITEEVER.Q           | 0            | 0       | 4                 | 3             | 0     |
| MFN2        | 720           | sp O95140 MFN2    | 1000      | K.K#IEVLDSLQSK.A          | 0            | 0       | 0                 | 1             | 0     |
| MRPL20      | 114           | sp Q9BYC9 RM20    | 1000      | K.TFK#SLAALASR.R          | 0            | 0       | 1                 | 0             | 0     |
| MTX1        | 187           | sp Q13505 MTX1    | 1000      | R.FTGAPLK#VHK.I           | 0            | 0       | 1                 | 1             | 0     |
| NME2        | 100           | sp P22392-2 NDKB  | 1000      | R.VMLGETNPADSK#PGTIR.G    | 0            | 0       | 2                 | 1             | 0     |
| NME2        | 239           | sp P22392-2 NDKB  | 1000      | R.NIHGSDSVK#SAEK.E        | 0            | 0       | 3                 | 2             | 0     |
| NT5C3A      | 77            | sp Q9H0P0 NT3A    | 1000      | R.VEEIICGLIK#GGAAK.L      | 0            | 0       | 1                 | 0             | 0     |
| PARK2       | 48            | sp O60260 PRKN2   | 1000      | R.VIFAGK#ELR.N            | 0            | 0       | 2                 | 1             | 1     |
| PARK2       | 408           | sp O60260 PRKN2   | 1000      | R.WEAASK#ETIK.K           | 1            | 0       | 2                 | 1             | 0     |
| SCCPDH      | 220           | sp Q8NBX0 SCPDL   | 1000      | R.NVSNLK#PVPPIGPK.L       | 0            | 0       | 2                 | 1             | 0     |
| SQSTM1      | 13            | sp Q13501 SQSTM   | 1000      | K.AYLLGK#EDAAR.E          | 0            | 0       | 1                 | 1             | 0     |
| TAX1BP1     | 288           | sp Q86VP1 TAXB1   | 1000      | K.VHLK#NTEIENTK.L         | 0            | 0       | 1                 | 0             | 0     |
| TAX1BP1     | 439           | sp Q86VP1 TAXB1   | 1000      | R.REVEDLKH#LR.L           | 0            | 0       | 2                 | 1             | 0     |
| TAX1BP1     | 450           | sp Q86VP1 TAXB1   | 1000      | R.LQM#AADHYK#EK.F         | 0            | 0       | 2                 | 0             | 0     |
| TAX1BP1     | 565           | sp Q86VP1 TAXB1   | 1000      | K.MELK#WK.E               | 0            | 0       | 1                 | 0             | 0     |
| TAX1BP1     | 571           | sp Q86VP1 TAXB1   | 1000      | K.EQVK#IAENVK.L           | 0            | 0       | 1                 | 1             | 0     |
| TAX1BP1     | 588           | sp Q86VP1 TAXB1   | 1000      | K.LELAEVQDNYK#ELK.R       | 0            | 0       | 1                 | 0             | 0     |
| TDRKH       | 175           | sp Q9Y2W6 TDRKH   | 1000      | R.LIK#ISGTQK.E            | 0            | 0       | 1                 | 0             | 0     |
| TDRKH       | 181           | sp Q9Y2W6 TDRKH   | 1000      | K.ISGTQK#EVAALK.H         | 0            | 0       | 1                 | 0             | 0     |
| TDRKH       | 187           | sp Q9Y2W6 TDRKH   | 1000      | K.EVAALK#HLLILEK.V        | 0            | 0       | 1                 | 0             | 0     |
| TOMM20      | 61            | sp Q15388 TOM20   | 1000      | K.LPDLK#DAEAVQK.F         | 1            | 1       | 2                 | 1             | 1     |
| TOMM70A     | 168           | sp O94826 TOM70   | 1000      | R.AAAFEQLQK#WK.E          | 0            | 0       | 5                 | 3             | 0     |
| TOMM70A     | 178           | sp O94826 TOM70   | 1000      | K.EVAQDCTK#AVELNPK.Y      | 0            | 0       | 2                 | 1             | 0     |
| TOMM70A     | 185           | sp O94826 TOM70   | 1000      | K.AVELNPK#YVK.A           | 0            | 0       | 1                 | 1             | 0     |
| TOMM70A     | 188           | sp O94826 TOM70   | 1000      | K.YVK#ALFR.R              | 0            | 0       | 2                 | 0             | 0     |
| TOMM70A     | 359           | sp O94826 TOM70   | 1000      | K.VISLK#EANVK.L           | 0            | 0       | 2                 | 1             | 0     |
| TOMM70A     | 470           | sp O94826 TOM70   | 1000      | K.GFEEVIK#K.F             | 0            | 0       | 1                 | 1             | 0     |
| TOMM70A     | 570           | sp O94826 TOM70   | 1000      | K.AIDM#FNK#AINLAK.S       | 0            | 0       | 3                 | 2             | 0     |
| TOMM70A     | 604           | sp O94826 TOM70   | 1000      | K.YGLK#PPTL.-             | 0            | 0       | 1                 | 1             | 0     |
| USP30       | 289           | sp Q70CQ3 UBP30   | 1000      | R.DVVCNDNCTK#IEAK.G       | 0            | 0       | 1                 | 0             | 0     |
| VCP         | 18            | sp P55072 TERA    | 1000      | K.GDDLSTAILK#QK.N         | 0            | 0       | 1                 | 1             | 0     |
| VCP         | 658           | sp P55072 TERA    | 1000      | R.VAILK#ANLR.K            | 0            | 0       | 1                 | 1             | 0     |
| VDAC1       | 61            | sp P21796 VDAC1   | 1000      | K.VTGSLETK#YR.W           | 0            | 0       | 1                 | 1             | 0     |
| VDAC1       | 109           | sp P21796 VDAC1   | 1000      | K.LTFDSSFSPNTGK#K.N       | 1            | 0       | 6                 | 4             | 0     |
| VDAC2       | 87            | sp P45880-1 VDAC2 | 1000      | K.VTGTLETK#YK.W           | 0            | 0       | 1                 | 0             | 0     |
| VDAC2       | 135           | sp P45880-1 VDAC2 | 1000      | K.LTFDSSFSPNTGK#K.S       | 0            | 0       | 10                | 6             | 0     |
| VDAC3       | 110           | sp Q9Y277-2 VDAC3 | 1000      | K.LTLDTIFVNTGK#K.S        | 1            | 0       | 2                 | 2             | 0     |
| VDAC3       | 164           | sp Q9Y277-2 VDAC3 | 1000      | K.SK#LSQNNFALGYK.A        | 0            | 0       | 3                 | 2             | 0     |
